# Supplementary material
Source: HighWire-hosted journal article supplement (https://bmjopen.bmj.com/content/15/5/e095877)
Supplement: inline-supplementary-material-1 [file inline-supplementary-material-1.pdf]

## Appendix 1

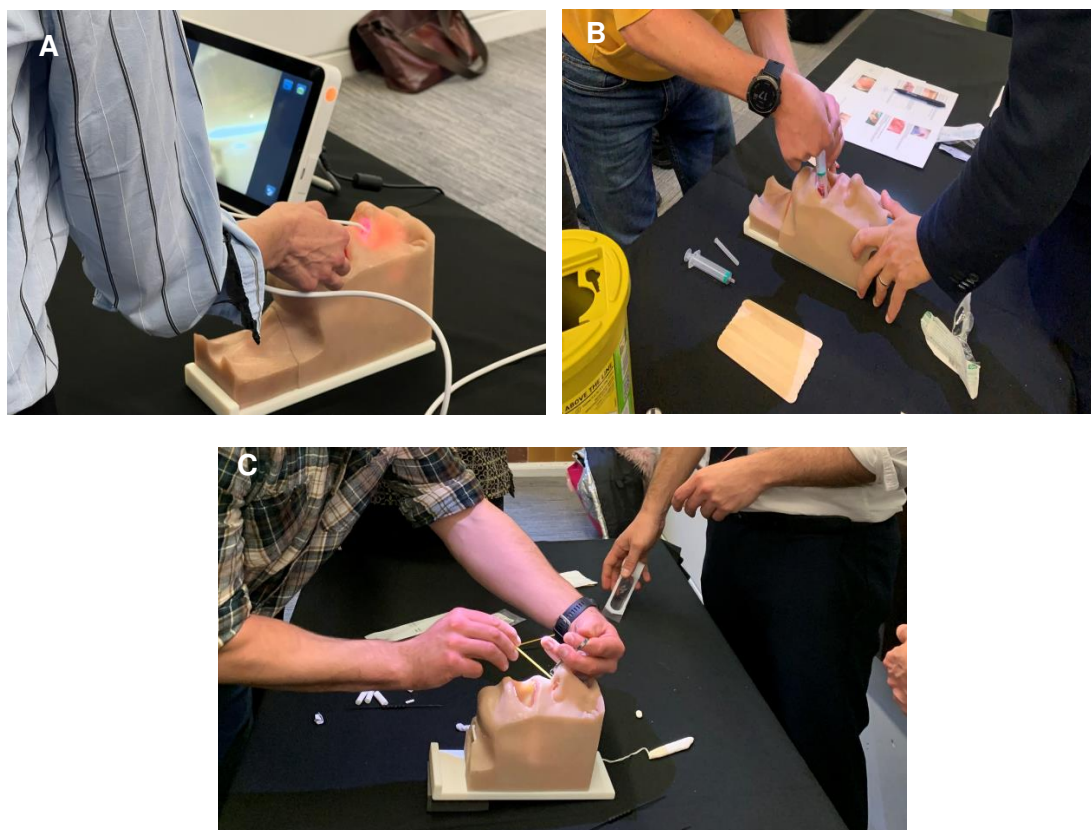

**Appendix 1A. Use of 3D models for practical skills training. (A) Flexible Nasendoscopy (B) Aspiration of Peritonsillar Abscess. (C) Nasal Cautery for Epistaxis Management.**

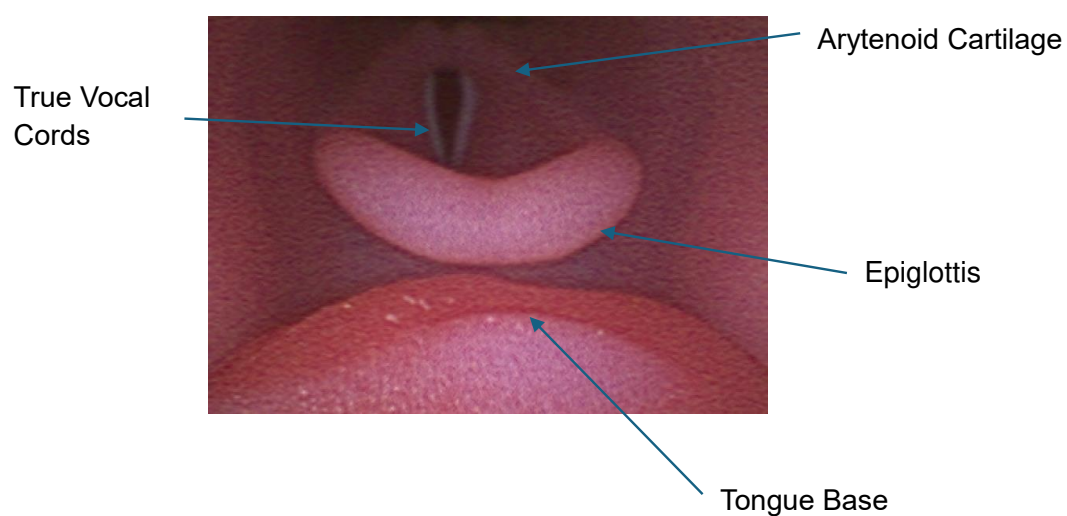

**Appendix 1b. Endoscopic appearance of a 3D model with visualized vocal cords, epiglottis, tongue base, and arytenoid cartilages.**
