# Supplementary material
Source: HighWire-hosted journal article supplement (https://bmjopen.bmj.com/content/15/5/e095877)
Supplement: inline-supplementary-material-2 [file inline-supplementary-material-2.pdf]

| How many times<br>had you<br>performed the<br>following<br>procedures prior<br>to the course? | 0        | 1-2      | 3-4      | 5-6      | 7-8      | >8       |
|-----------------------------------------------------------------------------------------------|----------|----------|----------|----------|----------|----------|
| Assessing for and<br>removing a<br>foreignn body of<br>the ear                                | 40 (44%) | 23 (26%) | 13 (14%) | 7 (8%)   | 4 (4%)   | 3 (3%)   |
| Assessing for and<br>removing a<br>foreignn body of<br>the nose                               | 36 (40%) | 22 (24%) | 13 (14%) | 11 (12%) | 4 (4%)   | 4 (4%)   |
| Assessing for and<br>removing a<br>foreign body of<br>the throat”                             | 61 (68%) | 11 (12%) | 13 (14%) | 5 (5%)   | 0 (0%)   | 0 (0%)   |
| Managing a<br>peritonsillar<br>abscess/Quinsy<br>including needle<br>aspiration               | 65 (72%) | 18 (20%) | 4 (4%)   | 3 (3%)   | 0 (0%)   | 0 (0%)   |
| Performing a<br>tracheostomy                                                                  | 76 (84%) | 5 (6%)   | 5 (6%)   | 4 (4%)   | 0 (0%)   | 0 (0%)   |
| Managing Otitis<br>Externa with the<br>insertion of a<br>pope otowick                         | 42 (47%) | 7 (8%)   | 4 (4%)   | 19 (21%) | 16 (18%) | 2 (2%)   |
| Managing a post-<br>thyroidectomy<br>haematoma                                                | 83 (92%) | 5 (6%)   | 2 (2%)   | 0 (0%)   | 0 (0%)   | 0 (0%)   |
| Managing                                                                                      | 14 (16%) | 25 (28%) | 7 (8%)   | 9 (10%)  | 4 (4%)   | 31 (34%) |

|                                                            |          |          |        |          |        |        |
|------------------------------------------------------------|----------|----------|--------|----------|--------|--------|
| epistaxis including nasal packing and cautery              |          |          |        |          |        |        |
| Managing a post-tonsillectomy bleed                        | 50 (56%) | 18 (20%) | 7 (8%) | 13 (14%) | 2 (2%) | 0 (0%) |
| Assessment of stridor and performing flexible nasendoscopy | 79 (88%) | 5 (6%)   | 2 (2%) | 0 (0%)   | 2 (2%) | 2 (2%) |

Appendix 3. Prior Experience with 10 Common ENT Emergencies.
